# Supplementary material for: Complete benzothiazole elimination by the solar photo-Fenton process in aqueous and β-cyclodextrin solutions
Source: Royal Society of Chemistry journal article supplement (doi:10.1039/d1nj02483c), 2021-01-01
Supplement: d1nj02483c1.pdf [file d1nj02483c1.pdf]

## **Complete Benzothiazole elimination by solar photo-Fenton in aqueous and $\beta$ -cyclodextrin solutions**

Agustina Reynoso<sup>a</sup>, Javier Zizzias<sup>b</sup>, Julieta Sacchetto<sup>a</sup>, Carolina Gambetta<sup>c</sup>,  
José Natera<sup>a,d</sup> and Walter A. Massad<sup>a\*</sup>

<sup>a</sup> *Instituto para el Desarrollo Agroindustrial y de la Salud (IDAS). CONICET – UNRC. Depto. De Química – FCEF-QyN - Universidad Nacional de Río Cuarto*

<sup>b</sup> *Facultad de Ingeniería - Universidad Nacional de Río Cuarto*

<sup>c</sup> *Instituto de Micología y Micotoxicología (IMICO). CONICET–UNRC. Depto. De Microbiología e Inmunología – FCEF-QyN - Universidad Nacional de Río Cuarto.*

<sup>d</sup> *Departamento de Estudios Básicos y Agropecuarios– FAV- UNRC.*

\*Corresponding author. *E-mail address:* [wmassad@exa.unrc.edu.ar](mailto:wmassad@exa.unrc.edu.ar) (W. A. Massad).

*Keywords:* Benzothiazole; solar photo-Fenton; simulated freshwater;  $\beta$ -cyclodextrin; solar reactor.

## 1. Simulated freshwater preparation

The following table summarizes the stock solutions used for the acidic simulated water preparation according to Smith *et. al.* <sup>1</sup>:

| Stock Solution                       | Mass of salt added to 100 mL of mQ water | Final required concentration (x10 <sup>3</sup> mg.L <sup>-1</sup> ) |                 |
|--------------------------------------|------------------------------------------|---------------------------------------------------------------------|-----------------|
|                                      |                                          | C <sup>Z+</sup>                                                     | A <sup>Z-</sup> |
| <b>Solution A1</b>                   |                                          |                                                                     |                 |
| NaCl                                 | 0.43                                     | 1.69                                                                | 2.61            |
| MgCl <sub>2</sub> ·6H <sub>2</sub> O | 0.65                                     | 0.77                                                                | 2.26            |
| CaCl <sub>2</sub> ·6H <sub>2</sub> O | 0.62                                     | 1.13                                                                | 2.01            |
| KCl                                  | 0.075                                    | 0.39                                                                | 0.35            |
| NaNO <sub>3</sub>                    | 0.31                                     | 0.84                                                                | 2.26            |
| <b>Solution A2</b>                   |                                          |                                                                     |                 |
| Na <sub>2</sub> SO <sub>4</sub>      | 0.6                                      | 1.94                                                                | 4.05            |
| <b>Solution A3</b>                   |                                          |                                                                     |                 |
| AlCl <sub>3</sub> ·6H <sub>2</sub> O | 0.15                                     | 0.16                                                                | 0.66            |
| HCl                                  | 0.7mL 1M in 100mL                        | 0.07                                                                | 2.48            |

1L of acidic water was prepared by the addition of the appropriate volumes of the previously prepared stock solutions A1, A2 and A3 using a 1: 1000 dilution factor. To do so, 3/4 of the bottle was filled with triple-distilled water and then 1mL of the stock solutions was added following the order A3, A1, and A2 while stirring continuously. It was left stirring for 12 hours. The resulting pH of the solution was 2.7.

## 2. Figures

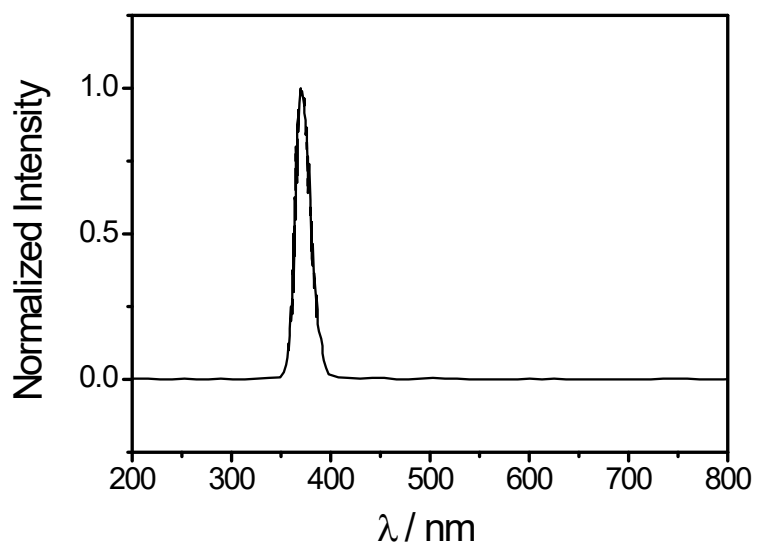

**Figure S1:** Emission spectra of GE F8T5BLB Fluorescent T5 Black Light Blue measured with a Spex Fluoromax spectro-fluorometer.

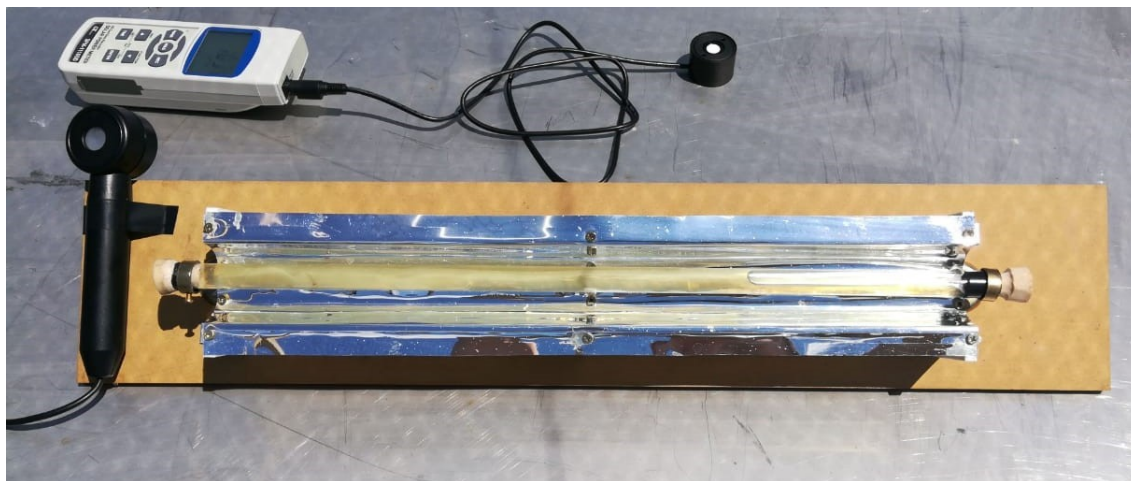

**Figure S2.** Reactor Solar with a cylindrical-parabolic solar collector (CPC)

## References

1 E. J. Smith, W. Davison and J. Hamilton-Taylor, *Water Res.*, 2002, **36**, 1286–1296.
